# Supplementary material for: Enhanced Synthesis of Foreign Nuclear Protein Stimulates Viral Reproduction via the Induction of γ-Thionin Expression
Source: MDPI journal article supplement (doi:10.3390/plants11121530), 2022-06-07
Supplement: s1 [file __FigS1-S3_TableS2.pdf › __FigS1-S3_TableS2.pdf]

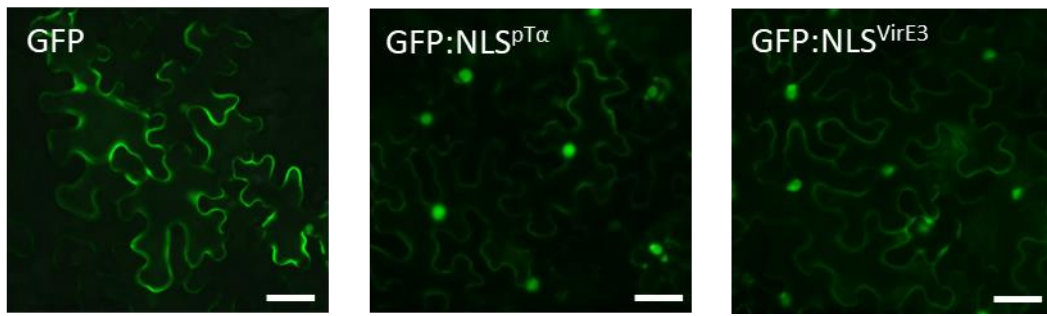

**Figure S1.** Fluorescent images of epidermal cells of *N. benthamiana* leaves agroinfiltrated with 35S-GFP (left), 35S-GFP:NLS<sup>pTα</sup> (middle) or 35S-GFP:NLS<sup>VirE3</sup> (right), scale bar = 20 μm

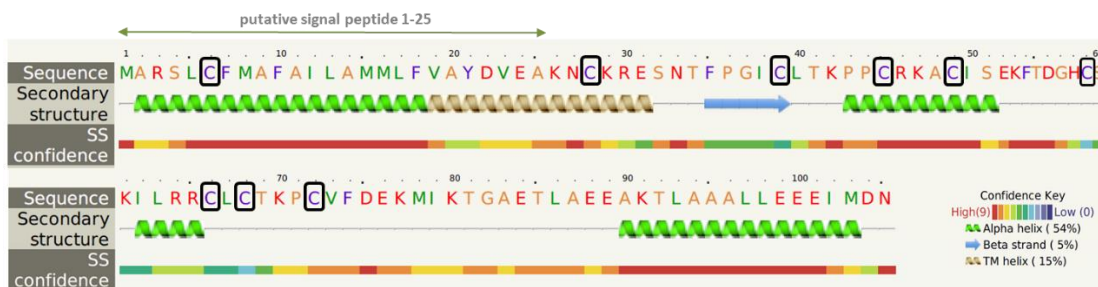

**Figure S2.** NbyThio secondary structure prediction by Phyre2 service [45] available at <http://www.sbg.bio.ic.ac.uk/phyre2/html/page.cgi?id=index>. Green helices represent  $\alpha$ -helices, blue arrows indicate  $\beta$ -strands. The 'SS confidence' line indicates the confidence in the prediction, with red being high confidence and blue low confidence. The putative signal peptide was predicted by SignalP service (<https://services.healthtech.dtu.dk/service.php?SignalP-5.0>). Cysteines are outlined with black rectangles.

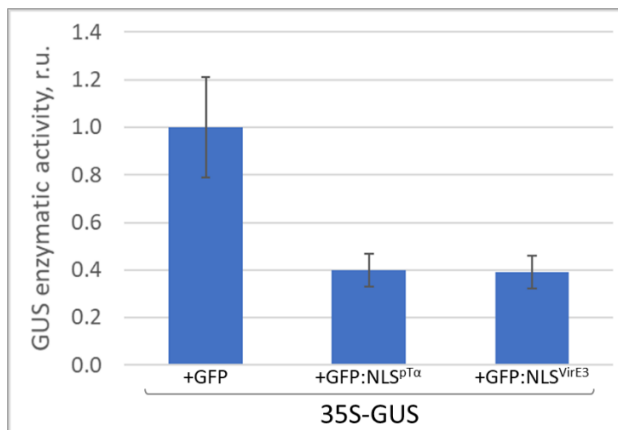

**Figure S3.** Comparative analysis of GUS activity in arbitrary units (a.u.) in leaves 3 days after co-agroinfiltration with 35S-GUS and 35S-based vectors encoding GFP, GFP:NLS<sup>pTα</sup>, and GFP:NLS<sup>VirE3</sup>. The fluorescence detected for the combination of 35S-GUS and 35S-GFP is taken as 1.

**Table S2. Oligonucleotides used for cloning and “genome walking”**

| Name                                 | Nucleotide sequence                                               |
|--------------------------------------|-------------------------------------------------------------------|
| mRFP_SacI_d                          | GAGCTCATGGCCTCCTCCGAGGACGTC                                       |
| mRFP_SalI_r                          | GTCGACTTAGGCGCCGGTGGAGTG                                          |
| mRFP_BamHI_r                         | GGATCCGGCGCCGGTGGAGTGGC                                           |
| mRFP_Acc65I_d                        | GGTACCGCCTCCTCCGAGGACGTC                                          |
| pT $\alpha$ _NLS_d                   | GAGCTCGCAATGAGAATCTTTGAATTTG                                      |
| pT $\alpha$ _NLS_r                   | GGTACCGTCATCCTCGTCGGTC                                            |
| VirE3_NLS_d                          | GGATCCGGTTCTATAAGAACGAAACGGCTTCGAGTAGACAACCC<br>AAAAGAATTAACGCGTG |
| VirE3_NLS_r                          | GTCGACTTACGTCTTGGTTTTGCGAAGTCTACCGTGCTCACGCGT<br>TAATTCTTTTGGGTTG |
| Pr $^{\gamma\text{Thio}}$ (HindIII+) | AAGCTTACCAGCACCTAAGCTCTCAT                                        |
| Pr $^{\gamma\text{Thio}}$ (NcoI-)    | ACAAGGAGCGAGCCATGGAGTTACTTTGAATGAGTAAAAAAGG                       |
| PrT prom Dir2                        | TTACCAGCACCTAAGCTCTCA                                             |
| PrT_ Rev1                            | ATAGGCAACAAAGAGCATCATT                                            |
| PrT_ Rev2                            | GAAGCACAAGGAGCGAGCCAT                                             |
| PrT_ Rev3                            | AATAAGTAAAAGGAAATAATTATTGCA                                       |
| PrT_ Rev10                           | TAACCTAGAACTCTAATACATGT                                           |
| PrT_ Rev11                           | CATGACTTTAAATCGAGATTTCT                                           |
| PrT_ Rev12                           | AACTGCACTACAATTCGTGAT                                             |
