# Supplementary material for: Enhanced Synthesis of Foreign Nuclear Protein Stimulates Viral Reproduction via the Induction of γ-Thionin Expression
Source: MDPI journal article supplement (doi:10.3390/plants11121530), 2022-06-07
Supplement: s1 [file Table S1_SSH.xlsx]

## Sheet: Лист2
Table S1. Clones upregulated in mRFP:NLS-expressing tissues as shown by suppressive subtractive hybridization of mRNA from leaves expressing 35S-mRFP versus 35S-mRFP:NLSpTα.
Gene onthology classification	Aligns with	Clone N	Sequence	1
GO:0006952 (defense response)	Defensin-like protein IPR008176 (Gamma thionin)	A4	ATATGCCTTACCAAACCACTATGCAGAAAAGCTTGTATCAGTGAGAAATTTACTGATGGTCATTGTAGCAAAATCCTCAGAAGGTGTCTATGCACTAAGCCATGTGTGTTTGATGAGAAGATGATCAAAACAGGAGCTGAAACTTTAGCTGAGGAAGCAAAAACTTTGGCTGCAGCTTTGCTTGAAGAAGAGATAATGGATAACTAATTAGAGATTAGAATAAATTAAGGATGGGGAGTCACACATAATAAAGTTTCTACCTTTCTTAAAAGTGTAGCTAATGTCGTGTTTTAATTGGCTTTTAGTGGCCTTTTATTACACTTTAAATA	1
GO:0006952 (defense response)	Defensin-like protein IPR008176 (Gamma thionin)	B10	ATTTACTGATGGTCATTGTAGCAAAATCCTCAGAAGGTGTCTATGCACTAAGCCATGTGTGTTTGATGAGAAGATGATCAAAACAGGAGCTGAAACTTTAGCTGAGGAAGCAAAAACTTTGGCTGCAGCTTTGCTTGAAGAAGAGATAATGGATAACTAATTAGAGATTAGAATAAATTAAGGATGGAG	1
GO:0006952 (defense response)	Defensin-like protein IPR008176 (Gamma thionin)	C5	CGGCCGAGGTACGGGGGATCACCGCAATATAACAGTATACTCAAAAAACTTCAAACTCCATAGTTATCTCTCTGAGTTACGCTTCTTATATTATCGTTACATATTTAAAACTATTTGCATCAGCATAGACAAAACCAAACAAATACAAAAAAGAATACACGTACGGGGGGACA	1
GO:0006952 (defense response)	Defensin-like protein IPR008176 (Gamma thionin)	D2	CGCGGCCGAGGTACGGGACGACCTCCCNCTGCAATTTTTCTTATTATTAAAATCCTACCCTTTCTTACTCATTCAAAGTAACTATGGCTCGCTCCTTGTGCTTCATGGCATTTGCTATCTTGGCAATGATGCTCTTTGTTGCCTATGATGTGCAAGCTAAAGATTGCAAAAGAGAAAGCAATACATTCCCTGGAATATGCCTTACCAAACCACTATGCAGAAAAGCTTGTATCAGTGAGAAATTTACTGATGGTCATTGTAGCAAAATCCTCAGAAGGTGTCTATGCACTAAGCCATGTGTGTTTGATGAGAAGATGATCAAAACAGGAGCTGAAACTTTAGCTGAGGAAGCAAAAACTTTGGCTGCAGCTTTGCTTGAAGAAGAGATAATGGATAACT…	1
GO:0006952 (defense response)	Defensin-like protein IPR008176 (Gamma thionin)	F11	CGCGGCCGAGGTACGGGGGACACCTCNNAATTGCAATTTTTCTTATTATTAAAATCCTAACCTTTCTTACTCATTCAAAGTAACTATGGCTCGCTCCTTGTGCTTCATGGCATTTGCTATCTTGGCAATGATGCTCTTTGTTGCCTATGATGTGGAAGCTAAAAATTGCAAAAGAGAAAGCAATACATTCCCTGGAATATGCCTTACCAAACCACCATGCAGAAAAGCTTGTATCAGTGAGAAATTTACTGATGGTCATTGTAGCAAAATCCTCAGAAGGTGTCTATGCACTAAGCCATGTGTGTTTGATGAGAAGATGATCAAAACAGGAGCTGAAACTTTAGCTGAGGAAGCAAAAACTTTGGCTGCAGCTTTGCTTGAAGAAGAGATAATGGATAA…	1
GO:0006952 (defense response)	Defensin-like protein IPR008176 (Gamma thionin)	G8	CGCGGCCGAGGTACGGGGGATCACCGCAATATAACAGTATACTCAAAAAACTTCAAACTCCATAGTTATCTCTCTGAGTTACGCTTCTTATATTATCGTTACATATTTAAAACTATTTGCATCAGCATAGACAAAACCAAACAAATACAAAAAAGAATACACGTACGGGGGGACACCTCTGAATTGCAATTTTTCTTATTATTAAAATTCCTATCCTTTCTTACTCATTCAAAGTAACTATGGCTCGCTCCTTGTGCTTCATGGCATTTGCTATCTTGGCAATGATGCTCTTTGTTGCCTATGATGTGGAAGCTAAA	1
GO:0006952 (defense response)	Defensin-like protein IPR008176 (Gamma thionin)	G10	TACATTCCCTGGAATATGCCTTACCAAACCACTATGCAGAAAAGCTTGTATCAGTGAGAAATTTACTGATGGTCATTGTAGCAAAATCCTCAGAAGGTGTCTATGCACTAAGCCATGTGTGTTTGATGAGAAGATGATCAAAACAGGAGCTGAAACTTTAGCTGAGGAAGCAAAAACTT	1
GO:0006952 (defense response)	Defensin-like protein IPR008176 (Gamma thionin)	H6	ACACCTCTGAATTGCAATTTTTCTTATTATTAAAATTCCTATCCTTTCTTACTCATTCAAAGTAACTATGGCTCGCTCCTTGTGCTTCATGGCATTTGCTATCTTGGCAATGATGCTCTTTGTTGCCTATGATGTGGAAGCTAAA	1
GO:0006952 (defense response)	Defensin-like protein IPR008176 (Gamma thionin)	H7	TCCTTGTGCTTCATGGCATTTGCTATCTTGGCAATGATGCTCTTTGTTGCCTATGATGTGGAAGCTAAAAATTGCAAAAGAGAAAGCAATACATTCCCTGGAATATGCCTTACCAAACCACCATGCAGAAAAGCTTGTATCAGTGAGAAATTTACTGATGGTCATTGTAGCAAAATCCTCAGAAGGTGTCTATGCACTAAGCCATGTGTGTTTGATGAGAAGATGATCAAAACAGGAGCTGAAACTTTAGCTGAGG	1
GO:0004867 (serine-type endopeptidase inhibitor activity), GO:0009611 (response to wounding)	Proteinase inhibitor I-B	C3	CGCGGCCGAGGTACTTGTCGCCGTAAAGNTTATGCTGATGGAGGGTTCAAGATGTTCTCTCTTGCTGATGCTTCTGGTCAGAGGACAGCCGCTGTTGCCTTGAGGAACTGCCTATATCTACTACCATTGGGTTACCTAGCCTATGGTGTGAGTCAATTTTCTGTATAGGAATATTTCCATTTCCGTTACTGTATGTGTAAAAATTACTTGACATGGCTTGAAGCGCCACCAAGTTTTATTAGGTAAGTGGACTAGTATTTTCCTCTCTCTGTCCAACTTTAGGTGTCTTAAGTTGACTTTAATACGTGAATTTGACCCTTTTTGTAGATGACCCTGGTTTAGGGAAGTGTGTACTCTATTTATTAATTCTTGGGGCAACTTATTCTGAATCTTCCACAA…	1
GO:0004867 (serine-type endopeptidase inhibitor activity), GO:0009611 (response to wounding)	Proteinase inhibitor I-B	C11	CTTAGCAGTCGCCGCTGGCTTTCCCACAAGTTCAGGCCATGATTGCTTTCCTGGGCAAATTATTGAGAGAGAGGCATCATCAAGTGGTTCCACTTGGTTTTCTTTTGTCACTGGAAATTGCAAGGCCTCTATTCCGTCACTCACTTCGAATACTAGATCTTGTGCCGTAAGAAGTTGAAAAAGTGATGCAAGGAGCAAGAAAGCAACTACATGAGATAACTTGAACATA	1
GO:0004867 (serine-type endopeptidase inhibitor activity), GO:0009611 (response to wounding)	Proteinase inhibitor I-B	E11	GGGGCAACTTATTCCGAATCTTCCATAANNGTCCCATAGAACTATTTAATTAACCCATGCTGGGAGTATCTCGCAACAATGAGTTTCCAGTTAACAACAACAAAAACTCGACCACAAACATAATTAAGTGGCCTAACCATACCAGGGAACAAAAACTGAACTTTGGCTATGGGATTTTCTTTCTCAATTATTCTCTTAGCAGTCGCCGCTGGCTTTCCCACAAGTTCAGGCCATGATTGCTTTCCTGGGCAAATTATTGAGAGAGAGGCATCATCAAGTGGTTCCACTTGGTTTTCTTTTGTCACTGGAAATTGCAAGGCCTCTATTCCGTCACTCACTTCGAATACTAGATCTTGTGCCGTAAGAAGTTGAAAAAGTGATGCAAGGAGCAAGAAAGCA…	1
GO:0004867 (serine-type endopeptidase inhibitor activity), GO:0009611 (response to wounding)	Proteinase inhibitor I-B	F9	CGCCGCTGGCTTTCCCACAAGTTCAGGCCATGATTGCTTTCCTGGGCAAATTATTGAGAGAGAGGCATCATCAAGTGGTTCCACTTGGTTTTCTTTTGTCACTGGAAATTGCAAGGCCTCTATTCCGTCACTCACTTCGAATACTAGATCTTGTGCCGTAAGAAGTTGAAAAAGTGATGCAAGGAGCAAGAAAGCAACTACATGAGATAACTTGAACATAGTCTTCCCTTCCATTGCCTTTGCTTTGAAAAATACAAAGAA	1
GO:0006508 (proteolysis), GO:0008234 (cysteine-type peptidase activity)	Cathepsin B-like cysteine proteinase	G1	CTCGCAGGTTGTTGAAAAACAAAAGCGATCGGCNTCTTCCTACAGTTGGGGATAGCTTGCCTGACTCAGTTGACTGGAGAGAGAAAGGTGTCTTGTTGGAGTTAAGGATCAAGGAAGCTGTGGGAGTTGTTGGGCATTCTCTGCAATTGCTTCCGTTGAAGCAGTGAACTCGATAGTCACTGGAGATGTGATTTCACTATCGGAGCAAGAGCTGGTTGATTGTGATACTTCCTACAACGGCGGTTGCAATGGCGGCCTTATGGACTATGCCTTTGATTTCCTCATTAAAAATGGAGGAATTGACACTGAGGAAGACTACCCTTACACAGGCCGAGATGGTAGATGTGACCAGTCAAGGA	1
GO:0006508 (proteolysis), GO:0008234 (cysteine-type peptidase activity)	Cathepsin B-like cysteine proteinase	G5	TCTGACCTTAGGAGCATAACGGTCACTTCTGTTCTTGCACAACTTACGTGGAACATCGATCTTAGTACCTAAGTACATGGACCGGTACTCCTCGTTTGTCAGATCAGTGAACCGGGTTAAACGCAGCTTGACTTGCCGTGCTGGACTAGCCACGACTCGTACAAAGCCAA	1
GO:0005524 (ATP binding)	ATP synthase subunit alpha	E10	GCCGAGGTACTATGATGGAGTTGGGCCCTAAACGAATCACGAAGAGCAAGAAGTGTCAGAAGTGAAAGCCCATGGTATTATTGAACGTAAATCTGTGCACGAGCCTATGCAAACAGGGTTAAACGCGGTAGATAGCCTGGTTCCTATAGGTCGTGGTCAACGAGAACTTATACTCGGGGACCGACAAACTGGAAAAAATGCTATTGCTCTCGATACCATATTAAACCAAAAGCAACTGAACTCAAGGGCCACCTCTGAGAGTGAGACATTGTATTGTGTCTATGTAGCGATTGGACAGAAACGCTCAACTGTGG	1
GO:0005215 (transporter activity)	Aquaporin-4	G11	GCGGCCGAGGTACTTAGGTCACCAATTAGCCCGGCTGTTGCAGCAAATATAAGGATATTATGTACCCACGAACTCTGCTCCCAACTTGCGAGTGAGGGAGAAATCTGGCGCGGGGAAGTCGGAG	1
	Unknown / uncharacterized	A10	ATGCATTACCATGCAGAAAAGCTTTTCTCGATGAGGGATTTACTGATGGAAAATGTAGCAAAATCCTCAGAAGGTGCATTTGCTATAAGCCATATGATCAAAACAGGAGCTGAAACTTTGACTGAGGAAGCAAAAACTTTGGCTGCAGCTTTGCTTGAAGAAGAGATGATGGATAACTAA	1
	Unknown / uncharacterized	B1	CATTACCATGCAGAAAAGCTTTTCTCGATGAGGGATTTACTGATGGAAAATGTAGCAAAATCCTCAGAAGGTGCATTTGCTATAAGCCATATGATCAAAACAGGAGCTGAAACTTTGACTGAGGAAGCAAAAACTTTGGCTGCAGCTTTGCTTGAAGAAGAGATGATGGATAACTAA	1
	Unknown / uncharacterized	B4	GGTACTTGTCGCCGTAAAGNTTATGCTGATGGAGGGTTCAAGATGTTCTCTCTTGCTGATGCTTCTGGTCAGAGGACAGCCGCTGTTGCCTTGAGGAACTGCCTATATCTACTACCATTGGGTTACCTAGCCTATGGTGTGAGTCAATTTTCTGTATAGGAATATTTCCATTTCCGT	1
	Unknown / uncharacterized	B5	TTACAAAAATGTGCTCCTATACCATGGATCTTGGAATTTTTTCTAATAGCGTCAGCTTCCACTTTTGCTATTCTACTTGTAATTTCAGTTACTTCCATTCATCTTTGTCAGCTCCTTTTGTCTTTTGAGAGTTCAGTTTCACTGCCCAAAATGAACTCAATACAATTCCTGTATTCATTCTTTTTTCTGATTTAATTCTTGGACAAGAAATTGATCAACTTTTTCAGCTCTTTTCTTAGTTCTCTTGGCTATTTCTGTAATTCTATGATGGTCAGCAGTG	1
	Unknown / uncharacterized	E2	ACAAACACATATCACAATTTGGGAAGGCAAGAAATACACACAAACAGACGTTTAATTGAAACAACGGAACACGAACAGAGGATAATTCAAAATACAAATTCATAGGGCTTCTGGTGGAACACCAAAAAGACAAGAATAGTTCACATATCAGCATTACAAATCCGAACGACACCCCAGGCTTGGCACAATCAAGGTCCTTTATTCTGAAAAACCTGGGAAAAAAAAATGACAGG	1
	Unknown / uncharacterized	F6	TCGCGGCCGTAGGTACATGGCAGTGGGGTGTTAGGGAAATGGAATTTATTTTTATTTCACAAATGGGCATGCTAGATCATATATCTATATACGGATAGCTAGATCGACCGGTGGATTCGCACCTGAGATCTTTCTACAGATAGTGGGGGTATCCACCCCTATGGCCATGTTCTATTCGGAGGAATAAAATAAAAATAGTCTTTCGGAGAGATGGCTGAGCGGTTGATAGCCCCGGTCTTGAAAACCGGTATAGTTTTAACCAAAGAACTATCGAGGGTTCGAATCCCTCTCTCTCCTTTTTTGCTAATTGAATAGATNNNCTCTGTAGGTGGTTTTGCCCAAACCTGCTATCCGAAAGAAAAGGGAATGGCTCGGCTATCCCACCTAGCCA	1
	Unknown / uncharacterized	G3	ACATGGCAGTGGGGTGTTAGGGAAATGGAATTTATTTTTATTTCACAAATGGGCATGCTAGATCATATATCTATATACGGATAGCTAGATCGACCGGTGGATTCGCACCTGAGATCTTTCTACAGATAGTGGGGGTATCCAC	1
	Unknown / uncharacterized	G7	ATTTCACAAATGGGCATGCTAGATCATATATCTATATACGGATAGCTAGATCGACCGGTGGATTCGCACCTGAGATCTTTCTACAGATAGTGGGGGTATCCACCCCTATGGCCATGTTCTATTCGGAGGAATAAAATAAAAATAGTCTTTCGGAGAGATGGCTGAGCGGTTGATAGCCCCGGTCTTGAAAACCGGTATAGTTTTAACCAAAGAACTATCGAGGGTTCGAATCCCTCTCTCTCCTTTTTTGCTAATTGAATAGATNNNCTCTGTAGGTGGTTTTGCCCAAA	1
	Unknown / uncharacterized	G9	TCGCGGCCGAGGTACACTTCAAGCATCTGCCATTCTTAAACTTCTCATCAGAATTATCCACTACCTAAGTGGAGAAGTCAGCATCAAACCATGATTTGCTCTTGACGCGCGTATCCAGTGAAGCCTCACGAGATTTGCCAAAGCAATACCTATAATATCTCGGATTGTAGCCATCTCAAGCCCTGAACAGGTAAATATG	1
	Unknown / uncharacterized	H3	TACAAGTTCAGTGACAGCAGCAGCAGCAGTGATGACAGTGATAATGAAAAATGTGGACAGAAGAAGAACTAAGAGGAGAGCCCATGAAAGATCATAAACA AGGAGTGCAAAGATGAAAGCAACTTGAATCCATTAATAAGACAGATGCTAAAGTACCTTAACATTCTATTAACATTTCTTATACCTGAATGGAGGAATGATGTGCCTATCAATAAATGCTTATCATTTTGATTATGCTATGAAAACGTTCAATGTTATTTAAGTGATCAGAACAAAGTTCTGTTCCTTAAACCAATCA	1
